# Supplementary material for: Rumen bacterial community profile and fermentation in Barki sheep fed olive cake and date palm byproducts
Source: PeerJ. 2021 Nov 17;9:e12447. doi: 10.7717/peerj.12447 (PMC8605757; doi:10.7717/peerj.12447)
Supplement: Supplemental Information 1 — Individual records of rumen fermentation parameters, enzymes, bacterial population, and Relative Growth Rate [file peerj-09-12447-s001.xlsx]

## Sheet: Raw data- feremntation
	Diet	pH	NH3N,mg/dl	VFA, meq/dl	Log 10	Acetic	Propionic	Butyric	Xylanase	Cellulase
S1	1	5.27	10.55	7.8	6.08623	26	70	4	4	5
S1	1	5.61	10.85	8.6	5.47965	41	56	3	8.5	9
S1	1	5.44	11.42	8.2	5.38987	37	60	3	17	12
S2	2	6.29	5.01	4.1	2.84368	51	45	4	2.5	6
S2	2	6.2	4.28	6.5	2.2201	47	48	5	15	5
S2	2	6.1	4.05	5.6	4.17879	54	40	6	7.5	9
S3	3	6.56	2.38	5.2	5.24734	55	36.5	8.5	2	5
S3	3	6.49	2.14	5.5	4.72429	56	35	9	2	7.5
S3	3	6.41	1.97	5.8	3.27719	53	38	9	7.5	12.5

## Sheet: Raw data- growth
				RGR
1		G1	1	68.75
1		G1	2	62.4
1		G1	3	66.5
1		G1	4	66.4
1		G1	5	68.5
1		G1	6	62.9
1		G1	7	67
1		G1	8	68.4
1		G1	9	68.5
1		G1	10	62.5
1		G1	11	64.4
1		G1	12	66
2		G2	1	55.75
2		G2	2	49.4
2		G2	3	53
2		G2	4	52.75
2		G2	5	56.75
2		G2	6	54
2		G2	7	54.5
2		G2	8	56.7
2		G2	9	55.5
2		G2	10	53.75
2		G2	11	53.4
2		G2	12	57.7
3		G3	1	57.8
3		G3	2	57.9
3		G3	3	61.7
3		G3	4	53.5
3		G3	5	52.7
3		G3	6	59.4
3		G3	7	52.5
3		G3	8	55.75
3		G3	9	64.5
3		G3	10	58
3		G3	11	58.7
3		G3	12	61
